# Supplementary material for: Monitoring of lead load and its effect on neonatal behavioral neurological assessment scores in Guiyu, an electronic waste recycling town in China
Source: Royal Society of Chemistry journal article supplement (doi:10.1039/b804959a), 2008-01-01
Supplement: b804959a.pdf [file b804959a.pdf]

## Supplementary 1:

### Neonatal behavioral neurological assessments (NBNA)

| Item                                                   | State   | Scores                      |                                  |                                                            |
|--------------------------------------------------------|---------|-----------------------------|----------------------------------|------------------------------------------------------------|
|                                                        |         | 0                           | 1                                | 2                                                          |
| 1 response to light                                    | sleep   | $\geq 11$                   |                                  | $\leq 6$                                                   |
| 2 response to voice                                    | sleep   | $\geq 11$                   | 7 - 10                           | $\leq 6$                                                   |
| 3 scarf sign                                           | awake   | surrounding neck            | 7 - 10                           | elbow not reaching<br>midline, activity can<br>be repeated |
| 4 arm recoil                                           | awake   | none                        | elbow exceed midline             | $\leq 3s$                                                  |
| 5 popliteal angle                                      | awake   | $> 110^\circ$               |                                  | $< 90^\circ$                                               |
| 6 lag recoil                                           | awake   | None                        | slowly and weak $> 3s$           | activity can be<br>repeated                                |
| 7 head control                                         | awake   |                             | 90 - 110°                        | $\leq 3s$                                                  |
| 8 grasp reflex                                         | awake   | lacking                     | slowly and weak $> 3s$           | good, keeping head for<br>1-2s                             |
| 9 Moro reflex                                          | awake   | none                        |                                  | can be repeated                                            |
| 10 startle reflex                                      | awake   | none                        |                                  | raising all body                                           |
| 11 comfort                                             | cry     | none                        | difficult to obtain but          | good , complete                                            |
| 12 static reflex                                       | awake   | can't                       | present                          | easy and freely                                            |
|                                                        |         | none                        | weak                             | support all body                                           |
| 13 stepping reflex                                     | awake   |                             | raising partial body             | powerfully                                                 |
| 14 sucking reflex                                      | awake   | none                        | weak , incomplete                | good and can persist                                       |
|                                                        |         | none                        |                                  | good and can swallow                                       |
| 15 consciousness                                       | awake   |                             | difficult                        | synchronically                                             |
| 16 cry                                                 | cry     | coma                        | incomplete and                   | normal                                                     |
|                                                        |         | none                        | transient                        | normal                                                     |
| 17 activity                                            | awake   |                             | difficult to begin               | normal                                                     |
|                                                        |         | lack or too much            | weak                             |                                                            |
| 18 voice responsiveness                                | awake   |                             |                                  | normal                                                     |
|                                                        | quietly | awaken quietly              | somnolence                       |                                                            |
| Non biological auditory<br>orientation reaction        |         |                             | weak、 sharp、 too                 | head or eye rotating                                       |
| 19 reaction to speakers                                | awake   |                             | much                             | head or eye rotating                                       |
|                                                        | quietly | head or eye don't<br>rotate | decrease or increase<br>slightly | $< 60^\circ$                                               |
| Biological visual and<br>auditory orientation reaction |         |                             | head or eye don't                | head or eye rotating                                       |

---

|                                            |         |                          |                      |                      |
|--------------------------------------------|---------|--------------------------|----------------------|----------------------|
| 20 reaction to red balls                   | awake   |                          | rotate               |                      |
|                                            | quietly | head or eye don't rotate | < 60°                | < 60°                |
| Non biological visual orientation reaction |         |                          | head or eye rotating | head or eye rotating |
|                                            |         |                          | < 60°                | < 60°                |
|                                            |         |                          | head or eye rotating |                      |
|                                            |         |                          | < 60°                |                      |

---

Statistic scores:

|                             |  |
|-----------------------------|--|
| Behavior 1 2 11 18 19 20    |  |
| Passive tone 3 4 5 6        |  |
| Active tone 7 8 9 12        |  |
| Primary reflexes 10 13 14   |  |
| General assessment 15 16 17 |  |

## Supplementary 2 :

### Puerpera Questionnaire

#### Part 1. General situation of puerpera

Name: \_\_\_\_\_ No.: \_\_\_\_\_

Date: \_\_/\_\_/\_\_

1. Education (years)

1) 1 to 6      2) 7 to 9      3) more than 10

2. Where do you live? Guiyu or other area \_\_\_\_\_

How many years have you been here? \_\_\_\_\_

3. How many months were you in Guiyu during pregnant period?

4. Classification of jobs:

A. E-waste recycling

A-1. burning board    A-2. plastics    A-3. cutting plastics    A-4.

Dismantling machine    A-5. dismantling screw    A-6. selecting copper

piece    A-7. selecting electric spare parts    A-8. washing plastics    A-9.

transportation

## B. Other jobs

B-1. food attendant B-2. transportation B-3. at home B-4. architecture  
B-5. farmer B-6. teacher B-7. government staff B-8. doctor B-9. laid off

You can select the jobs above.

- 1) Which was your job before or during pregnant period?
- 2) How many months had you been doing this job?
- 3) Your husband' job?
- 4) How many months your husband had been in his job?
- 5) Were your families living and working in the same place? Yes / No
5. Do you smoke? Yes / No

How long are you smoking (years)?

- 1) More than 1    2) 1 to 5    3) more than 5
6. Are any other families smoking at home? Yes / No
7. How many times you drink tea every day?  
1) Never    2) 1 to 3    3) more than 3

## Part 2. Health condition of the mother

8. History during pregnant period
  - 1) Healthy
  - 2) Falling ill about 1 to 3 times
  - 3) Falling ill about 3 to 4 times
  - 4) Falling ill more than 5 times
  - 5) Did you catch cold during pregnant period? Yes / No

9. How many hours had you been roaming in road during pregnant period?

- 1) Half an hour      2) 0.5 to 1      3) 1 to 2      4) more than 2

10. Characteristic of your diet during pregnant period:

- 1) How many preserved eggs you consumed every week during pregnant period?
- 2) How much milk you consumed every week during pregnant period?
- 3) How much bean you consumed every week during pregnant period?
- 4) Alcohol consumption      Yes/ No

Drinks per day\_\_\_\_\_

11. How many days were you out of your job during pregnant period?

### **Part 3. General health of the neonate**

12. Height (cm)\_\_\_\_\_

13. Weight (kg)\_\_\_\_\_

14. Sex \_\_\_\_\_

15. Gestational age (week)\_\_\_\_\_

16. The way of delivery

- 1) Spontaneous delivery      2) Cesarean delivery

17. Is there any abnormality? Which kind?      Yes/ No

18. Apgar scores\_\_\_\_\_

19. Parity\_\_\_\_(times)      Premature birth\_\_\_\_(times)

Miscarriage\_\_\_\_(times)      Fetal death\_\_\_\_(times)

Signature\_\_\_\_\_
